# Supplementary material for: Prevalence of papillomavirus in Brazil: a systematic review protocol
Source: PubMed Central journal article supplement — BMJ Open. 2016 Nov 22;6(11):e011884. doi: 10.1136/bmjopen-2016-011884 (PMC5129082; doi:10.1136/bmjopen-2016-011884), 2016-11-22
Supplement: bmjopen-2016-011884supp_file2.pdf [file bmjopen-2016-011884supp_file2.pdf]

**Additional File 2:** Details of electronic bibliographic database search strategies.

### **Medline (via Pubmed)**

(((((Brasil\*) OR Brazil\*)) OR Brazil[mesh]

AND

((("human papillomavirus") OR ("Human papillomavirus 31"[Mesh] OR "Human papillomavirus 6"[Mesh] OR "Human papillomavirus 16"[Mesh] OR "Human papillomavirus 18"[Mesh] OR "Human papillomavirus 11"[Mesh])) OR HPV)))

AND

((human) NOT animal)

### **Embase**

'human papillomavirus type 11'/exp OR 'human papillomavirus type 16'/exp OR 'human papillomavirus type 18'/exp OR 'human papillomavirus type 31'/exp OR 'human papillomavirus type 33'/exp OR 'human papillomavirus type 35'/exp OR 'human papillomavirus type 45'/exp OR 'human papillomavirus type 52'/exp OR 'human papillomavirus type 58'/exp OR 'human papillomavirus type 59'/exp OR 'human papillomavirus type 6'/exp OR 'human papillomavirus type 73'/exp OR 'Wart virus'/exp OR 'human papillomavirus':ab,ti OR 'hpv':ab,ti

AND

('brazil'/exp OR brazil\*:ab,ti OR brasil\*:ab,ti)

NOT

[animals]/lim

### **Lilacs**

(HPV OR Human papillomavirus OR Papillomavirus humano)

AND

(Brasil\$ OR Brazil\$)

### **Scielo**

("human papillomavirus" OR "papillomavirus humano" OR "human papilloma virus" OR HPV )

AND

(Brasil\* OR Brazil\*)

### **ISI - Web of Knowledge**

TS= ("human papillomavirus" OR HPV)

AND

TS=(Brazil\* OR Brasil\*)
